# Supplementary material for: Higher-order epistasis shapes natural variation in germ stem cell niche activity
Source: PubMed Central journal article supplement (PMC10192456; doi:10.1038/s41467-023-38527-0), 2023-05-17
Supplement: 41467_2023_38527_MOESM1_ESM.pdf [file 41467_2023_38527_MOESM1_ESM.pdf]

# Supplementary Information

## Higher-order epistasis shapes natural variation in germ stem cell niche activity

Sarah R Fausett<sup>1,2</sup>, Asma Sandjak<sup>1</sup>, Bénédicte Billard<sup>1</sup>, & Christian Braendle<sup>1</sup>

<sup>1</sup>Université Côte d'Azur, CNRS, Inserm, IBV, Nice, France

<sup>2</sup>Department of Biology and Marine Biology, University of North Carolina Wilmington, Wilmington, NC, USA

### **This PDF file includes:**

Supplementary Figures 1 to 4

Supplementary Notes 1 to 12

## Supplementary Figures

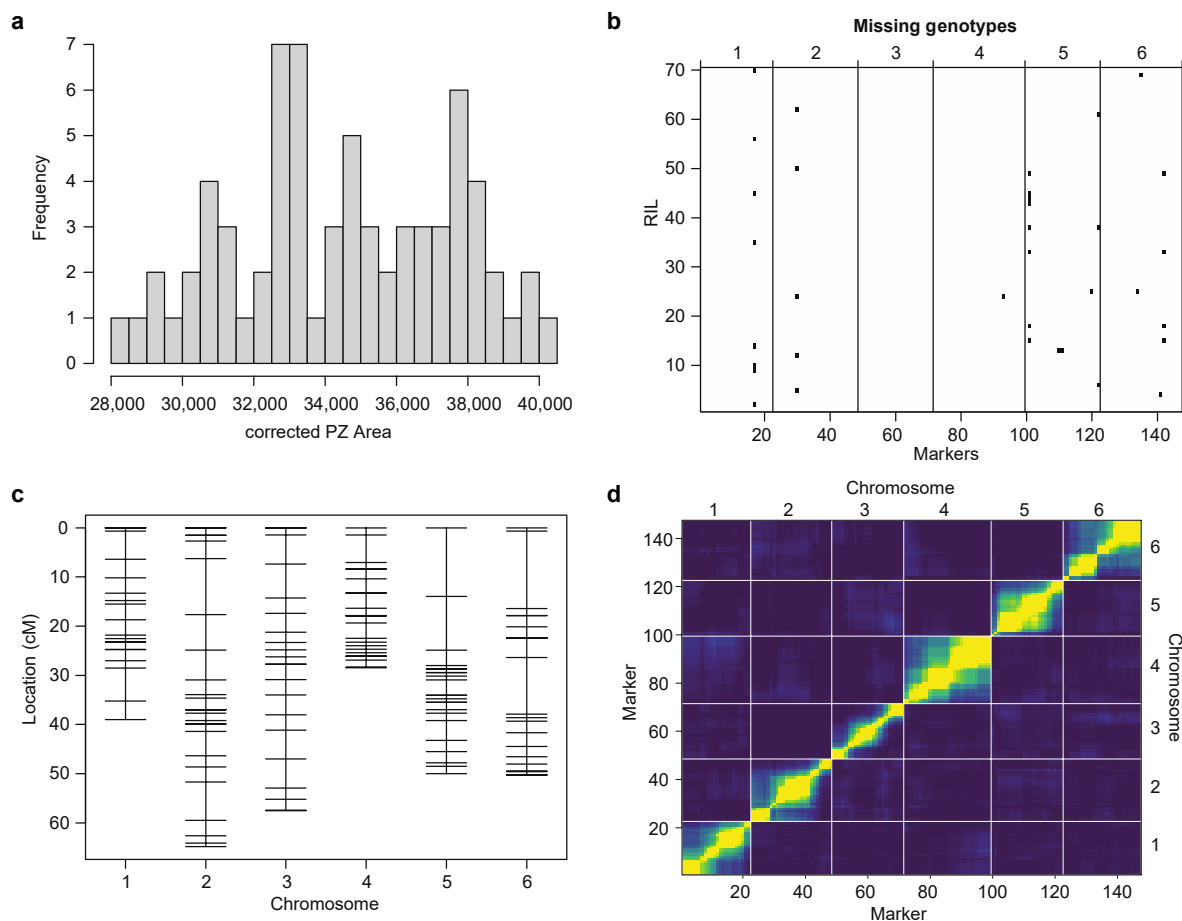

### Supplementary Figure 1. Additional data related to RIL phenotyping and mapping.

**a** Phenotype distribution (PZ size) for all RILs. Corrected means for each RIL were calculated using correction factors derived from the least square means of a data set containing only the parental lines from each block (S3-S8). See Experimental Procedures and Supplementary Note 5 for more detail. **b** Missing genotypes for each RIL across all markers. **c** Genetic markers cover the entire genome. **d** Heat map of the recombination fractions (top) and LOD scores (bottom) for the genetic map, yellow corresponds to less recombination between markers while purple corresponds to more recombination between markers. LOD scores are derived by testing whether the recombination fraction equals 0.5, as per the `est.rf()` function in the R/qtl package. Data are provided as a Source Data file.

**JU751cV del3.2 fwd1** **JU751cV del3.2 fwd2**  
 TCCGTTA**TGACTCTATTGCTCCTAATCCC**CCTTTTGTTCGGTTCGGCCTGAAA**CAAGAATAACAACAGGTGACTCG**ATA  
 ACTGTTAGGAAAATAAATTTTTGGTCCCAATATTTCCGGTATCCATTTCAAACATCTTTTAAAATTGTCAAGACAGACAATT  
 ACTTCTGCTTGAAATGAAGGACACATGTCCCCTCAATTCCTCATAAAACAAATAGA**GGGGTGTGCGAAATGATAAATGTTGC**  
G->A in repair  
 AAGTGA**G**GTGCAGATGGCAATGAAATTTATATATGTTT**CTTTCATTCCATTCTTGTGGGGCAATTTCAAACGTTTGATAAC**  
HLH-2 site **JU751cV del3-2 F5/R5**  
**TCACAGTGGTCTAGATTTGCAGAACATCTGTGTTAGGTCAAGCAGAGCGAGAATTTGAGCATTGAACTTTAGGGTCC**  
G->A in repair G->T in repair  
**TGGGGGGGGGAGGGGGGGGGGGGGGGGGGGGGGGGGTGTCTAGACAGTCAGCGGCCCATAA**GGG**TTTCATATGGTTTGACGG**  
 TGCATTGAACTATTTTTTAAGGAAAAAATTGAGATAAAGGCCATTTTTCCAAGAAAGCATCTAGCTTTTTCAACTGACACTA  
**JU751cV del3-2 R4**  
 CAAATTTCCCTATAACTTT**CTGAAATTATCAGTGAAAAGTTGCC**CAAATTTGAGACTTTAGCTAAAAATAGACAATTTTTTC  
SNP C->A  
 CAAAACTTTGAGCGGCCATAACTTTTTTTTTGAAAACTTTCGGAACGTCTCATTACAAAATTTGGTTGCTTTGAGC**C**ATTTT  
 GAATCCGAAAAAGTCTCAAAAAGCAAAGTCTTAAATTTCCGGTACTCCACCTTTAAAAAAAATAGGGTTTCCGCCGAAATTT  
 CTGGGTTCCAATAATATCTGTTACCATTTCCTTGCTCTGCGACGAGCAGCCACCAGACAAAAATCTCCTAATAC**CCCTCTT**  
**JU751cV del3.2 rev1**  
**CATGCCTTTGTTCT**TCGGGTTTGGCGGTCTGAAAAAGAGCACCCCTCCCGCGGGGGGCTCTCGGTATCTGTTCCGCAA  
**JU751cV del3.2 rev2**  
 AAACCGTCATATGGAGGGCTATCGG**GAGACGGGAAGAGTTGGAATAC**GGGAAATGGTGATG

**Supplementary Figure 2. Portion of *lag-2* promoter sequence in JU1200 containing the 148 bp deleted in JU751.** The deletion is bolded and underlined. The HLH-2 binding site<sup>73</sup>, genotyping primers, CRISPR induced mutations, and SNPs are annotated<sup>70,115</sup>. See Supplementary Data 1 for primer sequences.

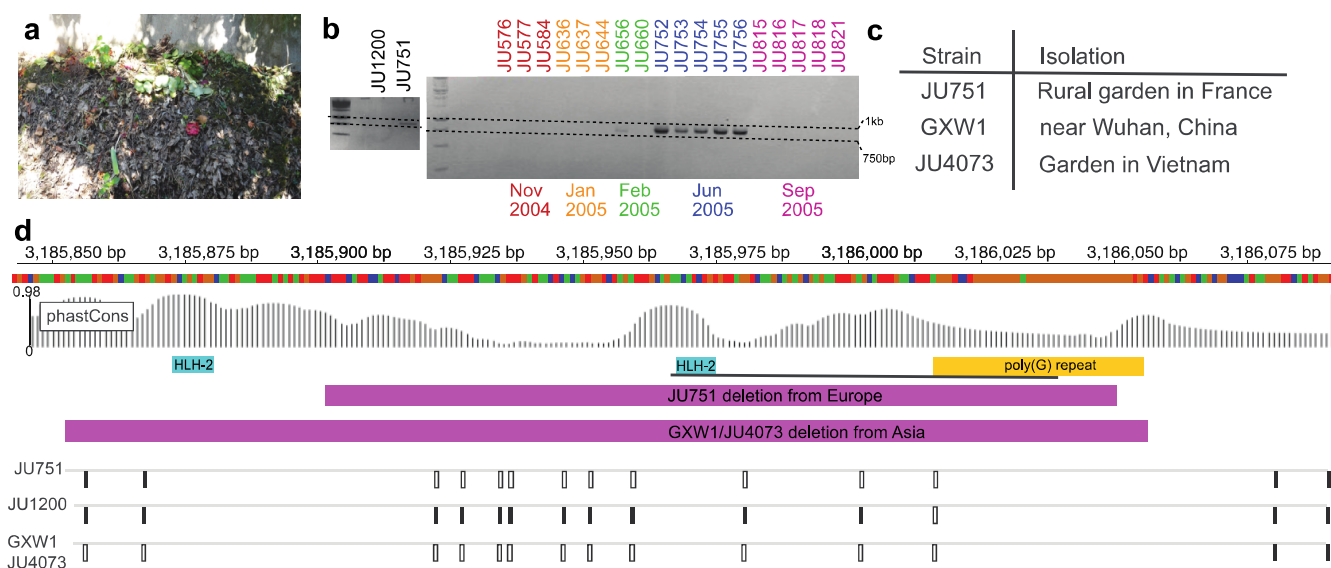

**Supplementary Figure 3. The JU751 deletion arose in the wild and is a recent, unique event.** **a** A photograph of the compost pile in Le Perreux-sur-Marne, France from which JU751 and the strains in panel b were isolated<sup>75</sup>. (Picture taken in 2018, Photo credit: Jean-Antoine Lepasant, Institut Jacques Monod, Paris, France). **b** Strains isolated from the compost pile in panel A during the months shown were genotyped for the presence of the *lag-2(cgb1007)* deletion. PCR results from a set of primers spanning the 148 bp deletion are shown. Single PCR across the long polyG repeat is not successful leading to lack of a band in JU1200 and a band of 860 bp in JU751. Strains JU752-756 isolated at the same time and place also give an 860 bp band while other strains isolated from the same place at different times of the year give no band. There are two separate gels shown. This experiment was repeated once with similar results. **c** Isolation locations for JU751 and strains containing a larger, but similar deletion<sup>70</sup>. **d** Variant annotation data from CeNDR showing the deletion region in JU1200, JU751, GXW1, and JU4073<sup>70,74</sup>. The extents of the deletions are marked by the magenta bars. The HLH-2 binding sites are marked by cyan bars. The polyG repeat is marked by a gold bar. Variants from ~1,500 annotated *C. elegans* strains are shown as dark gray solid bars. NO-CALL variants are shown as empty bars. Further confirmation that the deletion is only present in JU751 can be found in the CeNDR database (<https://elegansvariation.org>)<sup>70</sup>. Reference sequence data is from genome WS276<sup>115</sup>.

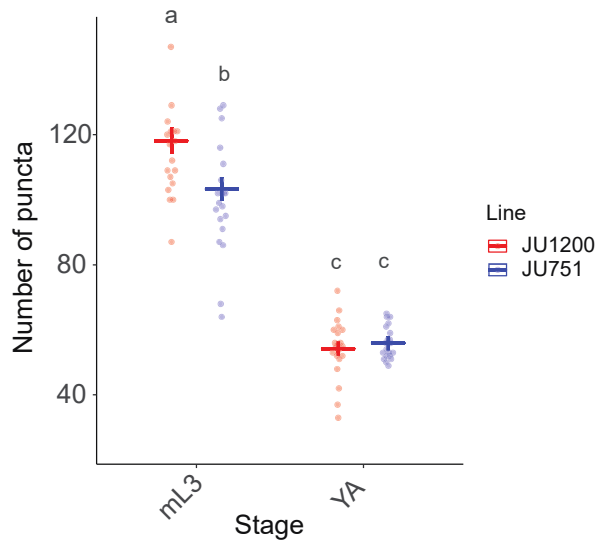

**Supplementary Figure 4. *lag-2* expression in the DTC of JU1200 and JU751 at midL4 and young adult.**

Data from quantification of *lag-2* transcripts via smFISH at mid-L3 and young adult. Crossbars and error bars represent estimated marginal means +/- standard error from a generalized linear model with a negative binomial distribution.  $n = 20$  for all four groups (single experiment). Lowercase letters indicate significant ( $p < 0.05$ ) Tukey-adjusted pairwise contrasts. For data and statistical results see Supplementary Note 12 and Source Data.

## Supplementary Notes

**Supplementary Note 1 (accompanies Fig. 1c). Statistical testing for correlation between the number of progenitor zone nuclei and progenitor zone size.** Data from two strains (JU1200 and JU751) and two adult stages (L4+24h, YA+24h) were fitted to a gaussian linear model,  $PZSize\_um^2 \sim Cells + Strain + Stage$ . For data representation (strain and stage aggregated, as their effects are not significant in the model below), see Fig. 1c. Data are provided as a Source Data file.

### Correlation between PZ cell number and PZ size: Gaussian linear model

Residual standard error: 321.8 on 83 degrees of freedom

Multiple R-squared 0.7662

Adjusted R-squared 0.758

F-statistic 90.69 on 3 and 83 degrees of freedom

$n = 87$

$p < 2.2E-16$

| Source      | Estimate | SE     | t-value | Pr> z )      |
|-------------|----------|--------|---------|--------------|
| Intercept   | 414.842  | 222.83 | 1.862   | 0.0662       |
| Cells       | 12.2113  | 0.9135 | 13.367  | <2.2E-16 *** |
| StrainJU751 | 115.667  | 104.17 | 1.110   | 0.2700       |
| StageYA+24  | 54.7432  | 82.777 | 0.661   | 0.5102       |

**Supplementary Note 2 (accompanies Fig. 1d). Statistical testing for differences in the size of the progenitor zones among selected wild isolates of *C. elegans* and *C. briggsae*.** **a** Raw data (PZ area in pixels) were fitted to a generalized linear mixed model,  $PZArea_{pixels} \sim Strain + (1|Exp)$ , with a negative binomial distribution (log link) and a dispersion parameter of  $37.5^{106,107}$ . The R software package, 'emmeans' was used to obtain estimated marginal means on the response scale (**b**) and pairwise contrasts (**c**) with Tukey corrected p-values<sup>108</sup>. **d** An estimate of broad sense heritability ( $H^2$ ) was derived by calculating the proportion of the variance explained by Strain in an ANOVA ( $PZArea \sim Strain + Exp$ ) of this same data. Area in pixels was scaled to  $\mu m^2/1,000$  for representation in Fig. 1d. Data are provided as a Source Data file.

**a) PZ Size in wild isolates: Negative binomial model**

| Source    | Estimate | SE      | Z-value | Pr> z )  |     |
|-----------|----------|---------|---------|----------|-----|
| Intercept | 10.41613 | 0.0272  | 382.9   | < 2e-16  | *** |
| CB4856    | -0.14976 | 0.03268 | -4.6    | 4.59E-06 | *** |
| CX11262   | -0.04457 | 0.03417 | -1.3    | 0.192034 |     |
| HK104     | -0.10483 | 0.03268 | -3.2    | 0.001337 | **  |
| JU1200    | 0.25508  | 0.02981 | 8.6     | < 2e-16  | *** |
| JU1491    | 0.15314  | 0.03425 | 4.5     | 7.77E-06 | *** |
| JU751     | 0.06414  | 0.03001 | 2.1     | 0.032583 | *   |
| JU775     | 0.08888  | 0.03411 | 2.6     | 0.009177 | **  |
| MY16      | 0.03845  | 0.03419 | 1.1     | 0.260849 |     |
| N2        | 0.10019  | 0.02993 | 3.3     | 0.000817 | *** |

**b) PZ Size in wild isolates: Emmeans**

| Strain  | n   | response   | SE         | df   |
|---------|-----|------------|------------|------|
| AF16    | 50  | 33393.7851 | 908.415431 | 1139 |
| CB4856  | 50  | 28749.1438 | 782.118305 | 1139 |
| CX11262 | 121 | 31938.0063 | 659.990888 | 1139 |
| HK104   | 50  | 30070.3221 | 818.044304 | 1139 |
| JU1200  | 180 | 43096.8579 | 707.047176 | 1139 |
| JU1491  | 118 | 38919.9543 | 809.491218 | 1139 |
| JU751   | 169 | 35605.6964 | 595.209483 | 1139 |
| JU775   | 123 | 36497.6877 | 751.01212  | 1139 |
| MY16    | 120 | 34702.6497 | 718.646237 | 1139 |
| N2      | 170 | 36912.7142 | 614.851536 | 1139 |

**c) PZ Size in wild isolates: Contrasts**

| Contrast         | ratio      | SE         | df   | t-ratio    | p-value    |     |
|------------------|------------|------------|------|------------|------------|-----|
| AF16 / CB4856    | 1.16155755 | 0.03795836 | 1139 | 4.58283737 | 0.00021846 | *** |
| AF16 / CX11262   | 1.04558139 | 0.03572386 | 1139 | 1.30458463 | 0.95269564 |     |
| AF16 / HK104     | 1.11052303 | 0.0362901  | 1139 | 3.20796461 | 0.04458804 | *   |
| AF16 / JU1200    | 0.77485429 | 0.02310083 | 1139 | -8.5559722 | 1.27E-13   | *** |
| AF16 / JU1491    | 0.85801193 | 0.02938501 | 1139 | -4.4714502 | 0.00036324 | *** |
| AF16 / JU751     | 0.9378776  | 0.02814523 | 1139 | -2.1371846 | 0.50138738 |     |
| AF16 / JU775     | 0.91495619 | 0.03121234 | 1139 | -2.6053949 | 0.21612601 |     |
| AF16 / MY16      | 0.96228344 | 0.03290344 | 1139 | -1.1243861 | 0.98222963 |     |
| AF16 / N2        | 0.90466892 | 0.02708016 | 1139 | -3.3469298 | 0.0288436  | *   |
| CB4856 / CX11262 | 0.90015462 | 0.03075644 | 1139 | -3.0785783 | 0.06535972 |     |
| CB4856 / HK104   | 0.95606371 | 0.03124402 | 1139 | -1.3748753 | 0.93477085 |     |
| CB4856 / JU1200  | 0.66708213 | 0.01988891 | 1139 | -13.578571 | 3.41E-14   | *** |
| CB4856 / JU1491  | 0.73867363 | 0.02529901 | 1139 | -8.8439648 | 1.20E-13   | *** |
| CB4856 / JU751   | 0.80743102 | 0.02423192 | 1139 | -7.127276  | 8.17E-11   | *** |
| CB4856 / JU775   | 0.78769768 | 0.02687226 | 1139 | -6.9952016 | 2.03E-10   | *** |
| CB4856 / MY16    | 0.82844233 | 0.02832821 | 1139 | -5.5040371 | 2.04E-06   | *** |
| CB4856 / N2      | 0.77884123 | 0.02331494 | 1139 | -8.3495758 | 1.48E-13   | *** |
| CX11262 / HK104  | 1.06211055 | 0.03628968 | 1139 | 1.76360516 | 0.75804118 |     |
| CX11262 / JU1200 | 0.74107505 | 0.01489957 | 1139 | -14.904163 | 3.41E-14   | *** |
| CX11262 / JU1491 | 0.8206075  | 0.0173465  | 1139 | -9.3530432 | 1.29E-13   | *** |
| CX11262 / JU751  | 0.89699148 | 0.01823029 | 1139 | -5.3488432 | 4.75E-06   | *** |
| CX11262 / JU775  | 0.87506931 | 0.01830673 | 1139 | -6.3790696 | 1.16E-08   | *** |
| CX11262 / MY16   | 0.92033336 | 0.01937291 | 1139 | -3.9439331 | 0.00338054 | **  |
| CX11262 / N2     | 0.8652305  | 0.01759653 | 1139 | -7.1178928 | 8.72E-11   | *** |
| HK104 / JU1200   | 0.69773815 | 0.02080256 | 1139 | -12.07178  | 3.41E-14   | *** |
| HK104 / JU1491   | 0.77261966 | 0.0264613  | 1139 | -7.5321861 | 4.66E-12   | *** |
| HK104 / JU751    | 0.84453683 | 0.02534509 | 1139 | -5.6302347 | 1.01E-06   | *** |
| HK104 / JU775    | 0.82389663 | 0.02810683 | 1139 | -5.6782355 | 7.71E-07   | *** |
| HK104 / MY16     | 0.86651372 | 0.02962966 | 1139 | -4.1901175 | 0.00123886 | **  |

|                 |            |            |      |            |            |     |
|-----------------|------------|------------|------|------------|------------|-----|
| HK104 / N2      | 0.81463319 | 0.02438598 | 1139 | -6.8487686 | 5.47E-10   | *** |
| JU1200 / JU1491 | 1.10732036 | 0.02241568 | 1139 | 5.03591895 | 2.43E-05   | *** |
| JU1200 / JU751  | 1.21039222 | 0.02118117 | 1139 | 10.9114687 | 1.09E-13   | *** |
| JU1200 / JU775  | 1.18081064 | 0.02363407 | 1139 | 8.30378008 | 1.56E-13   | *** |
| JU1200 / MY16   | 1.24188955 | 0.0250247  | 1139 | 10.7508008 | 1.19E-13   | *** |
| JU1200 / N2     | 1.16753425 | 0.02039989 | 1139 | 8.86495347 | 1.19E-13   | *** |
| JU1491 / JU751  | 1.09308224 | 0.02236466 | 1139 | 4.3499841  | 0.00062327 | *** |
| JU1491 / JU775  | 1.06636767 | 0.02245004 | 1139 | 3.0522364  | 0.07045444 |     |
| JU1491 / MY16   | 1.12152688 | 0.0237557  | 1139 | 5.41466278 | 3.33E-06   | *** |
| JU1491 / N2     | 1.05437802 | 0.02158697 | 1139 | 2.58630107 | 0.22521825 |     |
| JU751 / JU775   | 0.97556033 | 0.01974004 | 1139 | -1.2228218 | 0.96874758 |     |
| JU751 / MY16    | 1.02602242 | 0.02089853 | 1139 | 1.26124197 | 0.96180811 |     |
| JU751 / N2      | 0.96459166 | 0.01711941 | 1139 | -2.0312575 | 0.57694113 |     |
| JU775 / MY16    | 1.05172625 | 0.0220481  | 1139 | 2.40572088 | 0.32320127 |     |
| JU775 / N2      | 0.98875654 | 0.02002054 | 1139 | -0.5584271 | 0.99992588 |     |
| MY16 / N2       | 0.94012728 | 0.0191617  | 1139 | -3.0291396 | 0.07518765 |     |

d) PZ Size in wild isolates: ANOVA to calculate broad sense heritability

|           | Df   | Sum Sq      | Mean Sq    | F value    | Pr(>F)     |
|-----------|------|-------------|------------|------------|------------|
| Strain    | 9    | 16263025615 | 1807002846 | 49.086242  | 3.69E-75   |
| Exp       | 1    | 316046988.4 | 316046988  | 8.58524323 | 0.00345644 |
| Residuals | 1141 | 42003424249 | 36812817   | NA         | NA         |

$$H^2 = 16263025615 / (42003424249 + 316046988.4 + 16263025615) = 0.28$$



**Supplementary Note 3 (accompanies Fig. 2a). Statistical testing for differences in the number of progenitor zone nuclei between JU1200 and JU751 at L4 and adult stages.** Data were fitted to a generalized linear model with negative binomial distribution: Cells ~ Strain \* Stage, with a dispersion formula ~ Strain \* Stage, and log link (a, b)<sup>106,107</sup>. The R software package, 'emmeans' was used to obtain estimated marginal means on the response scale (c) and pairwise contrasts (d) with Tukey corrected p-values<sup>108</sup>. For data representation, see Fig. 2a. Data are provided as a Source Data file.

**a) PZ cells in JU1200 and JU751: Negative binomial conditional model**

| Source                  | Estimate | SE     | Z-value | Pr> z   |     |
|-------------------------|----------|--------|---------|---------|-----|
| Intercept               | 5.213    | 0.0585 | 89.11   | <2e-16  | *** |
| StrainJU751             | -0.038   | 0.0866 | -0.44   | 0.6573  |     |
| StagemL4+24             | 0.3053   | 0.0661 | 4.62    | 3.85e-6 | *** |
| StageYA                 | 0.4014   | 0.0637 | 6.30    | 2.9e-10 | *** |
| StagemYA+24             | 0.0737   | 0.0855 | 0.87    | 0.3821  |     |
| StrainJU751:StagemL4+24 | -0.2628  | 0.1170 | -2.25   | 0.0248  | *   |
| StrainJU751:StageYA     | -0.0850  | 0.0945 | -0.90   | 0.3686  |     |
| StrainJU751:StageYA+24  | 0.2221   | 0.1294 | -1.72   | 0.0862  |     |

**b) PZ cells in JU1200 and JU751: Negative binomial dispersion model**

| Source                  | Estimate | SE     | Z-value | Pr> z    |     |
|-------------------------|----------|--------|---------|----------|-----|
| Intercept               | 2.7645   | 0.3425 | 8.072   | 6.89e-16 | *** |
| StrainJU751             | -0.2384  | 0.4751 | -0.502  | 0.6159   |     |
| StagemL4+24             | 1.6540   | 0.5717 | 2.893   | 0.0038   | **  |
| StageYA                 | 1.9473   | 0.5614 | 3.468   | 0.0005   | *** |
| StagemYA+24             | -0.0864  | 0.4859 | -0.178  | 0.8589   |     |
| StrainJU751:StagemL4+24 | -1.7624  | 0.7473 | -2.358  | 0.0184   | *   |
| StrainJU751:StageYA     | -0.0974  | 0.7689 | -0.127  | 0.8992   |     |
| StrainJU751:StageYA+24  | -0.1461  | 0.6779 | -0.215  | 0.8294   |     |

**c) PZ cells in JU1200 and JU751: Emmeans**

| Strain | Stage  | n  | response | SE     | df  |
|--------|--------|----|----------|--------|-----|
| JU1200 | mL4    | 20 | 183.686  | 10.427 | 140 |
| JU751  | mL4    | 21 | 176.762  | 11.287 | 140 |
| JU1200 | mL4+24 | 17 | 249.263  | 7.662  | 140 |
| JU751  | mL4+24 | 18 | 184.441  | 13.367 | 140 |
| JU1200 | YA     | 20 | 274.398  | 6.896  | 140 |
| JU751  | YA     | 21 | 242.551  | 6.840  | 140 |
| JU1200 | YA+24  | 19 | 197.932  | 12.331 | 140 |
| JU751  | YA+24  | 20 | 152.540  | 11.181 | 140 |

**d) PZ cells in JU1200 and JU751: Contrasts**

| Contrast                     | ratio | SE    | df  | t-ratio | p-value   |     |
|------------------------------|-------|-------|-----|---------|-----------|-----|
| JU1200 mL4 / JU751 mL4       | 1.039 | 0.090 | 140 | 0.4437  | 9.998E-01 |     |
| JU1200 mL4 / JU1200 mL4+24   | 0.737 | 0.049 | 140 | -4.6194 | 2.281E-04 | *** |
| JU1200 mL4 / JU751 mL4+24    | 0.996 | 0.093 | 140 | -0.0440 | 1.000E+00 |     |
| JU1200 mL4 / JU1200 YA       | 0.669 | 0.043 | 140 | -6.3033 | 9.882E-08 | *** |
| JU1200 mL4 / JU751 YA        | 0.757 | 0.049 | 140 | -4.2803 | 8.825E-04 | *** |
| JU1200 mL4 / JU1200 YA+24    | 0.928 | 0.079 | 140 | -0.8740 | 9.879E-01 |     |
| JU1200 mL4 / JU751 YA+24     | 1.204 | 0.113 | 140 | 1.9812  | 4.982E-01 |     |
| JU751 mL4 / JU1200 mL4+24    | 0.709 | 0.050 | 140 | -4.8499 | 8.691E-05 | *** |
| JU751 mL4 / JU751 mL4+24     | 0.958 | 0.093 | 140 | -0.4403 | 9.998E-01 |     |
| JU751 mL4 / JU1200 YA        | 0.644 | 0.044 | 140 | -6.4087 | 5.812E-08 | *** |
| JU751 mL4 / JU751 YA         | 0.729 | 0.051 | 140 | -4.5328 | 3.247E-04 | *** |
| JU751 mL4 / JU1200 YA+24     | 0.893 | 0.080 | 140 | -1.2680 | 9.090E-01 |     |
| JU751 mL4 / JU751 YA+24      | 1.159 | 0.113 | 140 | 1.5161  | 7.976E-01 |     |
| JU1200 mL4+24 / JU751 mL4+24 | 1.351 | 0.106 | 140 | 3.8258  | 4.721E-03 | **  |
| JU1200 mL4+24 / JU1200 YA    | 0.908 | 0.036 | 140 | -2.4195 | 2.403E-01 |     |
| JU1200 mL4+24 / JU751 YA     | 1.028 | 0.043 | 140 | 0.6544  | 9.980E-01 |     |
| JU1200 mL4+24 / JU1200 YA+24 | 1.259 | 0.087 | 140 | 3.3192  | 2.477E-02 | *   |
| JU1200 mL4+24 / JU751 YA+24  | 1.634 | 0.130 | 140 | 6.1786  | 1.842E-07 | *** |
| JU751 mL4+24 / JU1200 YA     | 0.672 | 0.052 | 140 | -5.1787 | 2.072E-05 | *** |
| JU751 mL4+24 / JU751 YA      | 0.760 | 0.059 | 140 | -3.5218 | 1.314E-02 | *   |
| JU751 mL4+24 / JU1200 YA+24  | 0.932 | 0.089 | 140 | -0.7387 | 9.956E-01 |     |
| JU751 mL4+24 / JU751 YA+24   | 1.209 | 0.125 | 140 | 1.8423  | 5.925E-01 |     |
| JU1200 YA / JU751 YA         | 1.131 | 0.043 | 140 | 3.2661  | 2.906E-02 | *   |
| JU1200 YA / JU1200 YA+24     | 1.386 | 0.093 | 140 | 4.8626  | 8.235E-05 | *** |

|                                   |       |       |     |        |           |     |
|-----------------------------------|-------|-------|-----|--------|-----------|-----|
| <i>JU1200 YA / JU751 YA+24</i>    | 1.799 | 0.139 | 140 | 7.5776 | 1.223E-10 | *** |
| <i>JU751 YA / JU1200 YA+24</i>    | 1.225 | 0.084 | 140 | 2.9727 | 6.643E-02 |     |
| <i>JU751 YA / JU751 YA+24</i>     | 1.590 | 0.125 | 140 | 5.9056 | 7.024E-07 | *** |
| <i>JU1200 YA+24 / JU751 YA+24</i> | 1.298 | 0.125 | 140 | 2.7080 | 1.289E-01 |     |

**Supplementary Note 4 (accompanies Fig. 2b). Statistical testing for differences in the number of dividing progenitor zone nuclei (EdU+, 15-minute pulse) between JU1200 and JU751 at the mid L4 stage.** Data were fitted to a linear model with gaussian distribution:  $\text{EdU\_Cells} \sim \text{Strain}$  with a dispersion estimate ( $\sigma^2$ ) of 147 (a)<sup>106, 107</sup>. The R software package, 'emmeans' was used to obtain estimated marginal means (b) and pairwise contrasts (c) with Tukey corrected p-values<sup>108</sup>. For data representation, see Fig. 2b. Data are provided as a Source Data file.

**a) EdU+ PZ cells in JU1200 and JU751 at mL4: Gaussian conditional model**

| Source      | Estimate | SE    | Z-value | Pr> z ) |     |
|-------------|----------|-------|---------|---------|-----|
| Intercept   | 100.636  | 2.585 | 38.93   | <2e-16  | *** |
| StrainJU751 | -15.956  | 3.545 | -4.50   | 6.75e-6 | *** |

**b) EdU+ PZ cells at mL4 in JU1200 and JU751 at mL4: Emmeans**

| Strain | n  | response | SE    | df |
|--------|----|----------|-------|----|
| JU1200 | 22 | 100.636  | 2.585 | 44 |
| JU751  | 25 | 84.680   | 2.425 | 44 |

**c) EdU+ PZ cells at mL4 in JU1200 and JU751 at mL4: Contrasts**

| Contrast       | ratio  | SE     | df | t-ratio | p-value |     |
|----------------|--------|--------|----|---------|---------|-----|
| JU1200 / JU751 | 15.956 | 3.5447 | 44 | 4.502   | 4.90e-5 | *** |

**Supplementary Note 5 (accompanies Fig. 3a). Correction of block effect in the RIL data set.** RIL data were collected in six blocks (SB3-SB8), each of which contained both RIL parents. **a** We performed a two-way ANOVA on the parental data alone to determine whether there was an effect of block on PZ Area. Formula: PZArea\_pixels ~ Line \* Block. **b** Least squares means were used to derive a correction factor for each block by dividing the least squares mean of each block (SB4-SB8) by that of block SB3. Raw PZ area in pixels for each sample was multiplied by the correction factor to generate Corr\_PZArea\_pixels. The mean corrected PZ area (Corr\_PZArea\_pixels) for each RIL was used as the phenotype for QTL mapping (Source Data: Fig3a\_mapping). Area in pixels was scaled to  $\mu\text{m}^2/1,000$  for presentation in Figs. 3a, e, and h ( $0.1008 \mu\text{m}^2/\text{pixel}$ ). Data are provided as a Source Data file.

**a) ANOVA from only parental data from each block.**

|                   | <i>df</i> | <i>Sum Sq</i> | <i>Mean Sq</i> | <i>F-value</i> | <i>Pr(&gt;F)</i> |     |
|-------------------|-----------|---------------|----------------|----------------|------------------|-----|
| <i>Line</i>       | 1         | 3987203584    | 3987203584     | 156.81         | 5.92E-30         | *** |
| <i>Block</i>      | 5         | 3376974720    | 675394944      | 26.563         | 9.65E-23         | *** |
| <i>Line:Block</i> | 5         | 140124205     | 28024841       | 1.1022         | 0.3589           | ns  |
| <i>Residuals</i>  | 348       | 8848410248    | 25426466.23    | NA             | NA               |     |

**b) Calculation of least squares means and correction factors.**

| <i>Block</i> | <i>n</i> | <i>lsmean</i> | <i>SE</i>  | <i>df</i> | <i>lower.CL</i> | <i>upper.CL</i> | <i>Corr_factor</i> |
|--------------|----------|---------------|------------|-----------|-----------------|-----------------|--------------------|
| <i>SB3</i>   | 300      | 33784.6       | 650.979598 | 348       | 32504.2506      | 35064.9494      | 1                  |
| <i>SB4</i>   | 510      | 34671.3167    | 650.979598 | 348       | 33390.9672      | 35951.6661      | 1.02624618         |
| <i>SB5</i>   | 540      | 36650.4667    | 650.979598 | 348       | 35370.1172      | 37930.8161      | 1.0848276          |
| <i>SB6</i>   | 420      | 37485.3833    | 650.979598 | 348       | 36205.0339      | 38765.7328      | 1.10954054         |
| <i>SB7</i>   | 540      | 35956.65      | 650.979598 | 348       | 34676.3006      | 37236.9994      | 1.06429113         |
| <i>SB8</i>   | 510      | 43251.5333    | 650.979598 | 348       | 41971.1839      | 44531.8828      | 1.28021446         |

**Supplementary Note 6 (accompanies Fig. 3j) Statistical data for the multi-QTL model.** The fitqtl() function in R/qtl was used to generate model statistics (two-sided) for  $\text{Corr\_PZArea\_pixels} \sim \text{chrII@pos37.0} + \text{chrV@pos0.0}^{72}$ .

**a) Full model result:**

Method: Haley-Knott regression

Model: normal phenotype

Number of observations: 70

|              | <i>df</i> | <i>SS</i> | <i>MS</i> | <i>LOD</i> | <i>%var</i> | <i>P value (Chi<sup>2</sup>)</i> | <i>P value (F)</i> |     |
|--------------|-----------|-----------|-----------|------------|-------------|----------------------------------|--------------------|-----|
| <i>Model</i> | 2         | 2.0e8     | 1.0e8     | 5.85       | 31.96       | 1.4e-06                          | 2.5e-06            | *** |
| <i>Error</i> | 67        | 4.3e8     | 6.4e6     |            |             |                                  |                    |     |
| <i>Total</i> | 69        | 6.3e7     |           |            |             |                                  |                    |     |

**b) Drop one QTL at a time ANOVA table:**

|                | <i>df</i> | <i>Type III SS</i> | <i>LOD</i> | <i>%var</i> | <i>F value</i> | <i>P value (Chi<sup>2</sup>)</i> | <i>P value (F)</i> |     |
|----------------|-----------|--------------------|------------|-------------|----------------|----------------------------------|--------------------|-----|
| <i>II@37.0</i> | 1         | 1.3e8              | 4.036      | 20.69       | 20.38          | 0                                | 2.64e-05           | *** |
| <i>V@0.0</i>   | 1         | 8.6e7              | 2.794      | 13.73       | 13.52          | 0                                | 0.000472           | *** |

**c) Estimated effects:**

|                  | <i>estimate</i> | <i>SE</i> | <i>t</i> |
|------------------|-----------------|-----------|----------|
| <i>Intercept</i> | 34477.6         | 303.9     | 113.437  |
| <i>II@37.0</i>   | -1371.9         | 303.9     | -4.514   |
| <i>V@0.0</i>     | -1119.6         | 304.5     | -3.677   |

**Supplementary Note 7 (accompanies Fig. 4c). Statistical testing for differences in young adult progenitor zone size among the parental lines and JU1200 NILs. a** Data from nine experimental blocks were analyzed together. Raw PZ Area in pixels was fitted to a generalized linear mixed model with a negative binomial distribution and a log link,  $PZArea\_pixels \sim Genotype * (1|Exp)$  with dispersion formula  $\sim Genotype^{106, 107}$ . **b, c** The R software package, 'emmeans' was used to obtain estimated marginal means on the response scale and pairwise contrasts with Tukey corrected p-values<sup>108</sup>. Area in pixels was scaled to  $\mu m^2/1,000$  for presentation in Fig. 4c ( $0.0504 \mu m^2/pixel$ ). Data are provided as a Source Data file.

**a) PZ size across 9 experiments: Negative binomial conditional models**

Random effects:

| Groups | Source    | Variance | Std.Dev |
|--------|-----------|----------|---------|
| Exp    | Intercept | 0.003648 | 0.0604  |

Number of obs: 1,557, groups: Exp, 9

Main effects:

| Source          | Estimate | SE      | Z-value | Pr> z )      |
|-----------------|----------|---------|---------|--------------|
| Intercept       | 11.45866 | 0.02123 | 539.7   | < 2e-16 ***  |
| GenotypeJU751   | -0.22330 | 0.00979 | -22.8   | < 2e-16 ***  |
| GenotypeNIC1697 | -0.05175 | 0.01054 | -4.9    | 9.04e-07 *** |
| GenotypeNIC1701 | -0.04231 | 0.01057 | -4.0    | 6.23e-05 *** |

Dispersion model:

| Source          | Estimate | SE      | Z-value | Pr> z )     |
|-----------------|----------|---------|---------|-------------|
| Intercept       | 3.87949  | 0.06531 | 59.40   | < 2e-16 *** |
| GenotypeJU751   | -0.19045 | 0.09405 | -2.02   | 0.0429 *    |
| GenotypeNIC1697 | 0.16493  | 0.10868 | 1.52    | 0.1291      |
| GenotypeNIC1701 | 0.12415  | 0.10449 | 1.19    | 0.2348      |

**b) PZ size in JU1200 NILs across 9 experiments: Emmeans**

| Genotype | n   | response   | SE         | df   |
|----------|-----|------------|------------|------|
| JU1200   | 481 | 94717.8457 | 2010.82067 | 1548 |
| JU751    | 474 | 75762.3242 | 1625.40589 | 1548 |
| NIC1697  | 289 | 89940.653  | 1953.82761 | 1548 |
| NIC1701  | 312 | 90793.8034 | 1977.71553 | 1548 |

**c) PZ size in JU1200 NILs across 9 experiments: Contrasts**

| Contrast          | Ratio      | SE         | df   | t-ratio    | p-value        |
|-------------------|------------|------------|------|------------|----------------|
| JU1200 / JU751    | 1.2501972  | 0.01223992 | 1548 | 22.8082032 | <2e-16 ***     |
| JU1200 / NIC1697  | 1.05311494 | 0.01109685 | 1548 | 4.91141477 | 5.96E-06 ***   |
| JU1200 / NIC1701  | 1.04321927 | 0.01102459 | 1548 | 4.00378144 | 0.00037965 *** |
| JU751 / NIC1697   | 0.84235906 | 0.00922837 | 1548 | -15.65887  | <2e-16 ***     |
| JU751 / NIC1701   | 0.83444378 | 0.00922435 | 1548 | -16.372524 | 0=<2e-16 ***   |
| NIC1697 / NIC1701 | 0.99060343 | 0.01155421 | 1548 | -0.8094267 | 0.85003654     |

**Supplementary Note 8 (accompanies Fig. 4d). Statistical testing for differences in young adult Progenitor Zone size among the parental lines and JU751 NILs.** **a** Raw data (PZ area in pixels) from one representative experiment of nine were fitted to a generalized linear model with a negative binomial distribution and a log link,  $PZArea\_pixels \sim Strain$ , with dispersion parameter of  $60.2^{106, 107}$ . **b, c** The R software package, 'emmeans' was used to obtain estimated marginal means on the response scale and pairwise contrasts with Tukey corrected p-values<sup>108</sup>. Area in pixels was scaled to  $\mu m^2/1,000$  for presentation in Fig. 4d ( $0.1008 \mu m^2/pixel$ ). Data are provided as a Source Data file.

**a) PZ size in parental lines and JU751 NILs: Gaussian conditional model**

| Source        | Estimate | SE      | Z-value | Pr> z )  |     |
|---------------|----------|---------|---------|----------|-----|
| Intercept     | 10.81931 | 0.01922 | 562.8   | < 2e-16  | *** |
| StrainJU751   | -0.21814 | 0.02719 | -8      | 1.03E-15 | *** |
| StrainNIC1671 | -0.11557 | 0.02719 | -4.3    | 2.13E-05 | *** |
| StrainNIC1672 | -0.07027 | 0.02719 | -2.6    | 0.00974  | **  |
| StrainNIC1673 | -0.12449 | 0.02719 | -4.6    | 4.67E-06 | *** |
| StrainNIC1675 | -0.0306  | 0.02719 | -1.1    | 0.26036  |     |
| StrainNIC1676 | -0.2371  | 0.02719 | -8.7    | < 2e-16  | *** |

**b) PZ size in parental lines and JU751 NILs: Emmeans**

| Strain  | n  | response   | SE         | df  |
|---------|----|------------|------------|-----|
| JU1200  | 45 | 49976.6843 | 960.742959 | 307 |
| JU751   | 45 | 40181.811  | 772.561924 | 307 |
| NIC1671 | 45 | 44522.2362 | 855.950461 | 307 |
| NIC1672 | 45 | 46585.1892 | 895.583778 | 307 |
| NIC1673 | 45 | 44126.8179 | 848.353619 | 307 |
| NIC1675 | 45 | 48470.5764 | 931.807047 | 307 |
| NIC1676 | 45 | 39427.0885 | 758.061678 | 307 |

**c) PZ size in parental lines and JU751 NILs: Contrasts**

| Contrast          | ratio      | SE         | df  | t-ratio    | p-value    |     |
|-------------------|------------|------------|-----|------------|------------|-----|
| JU1200 / JU751    | 1.24376386 | 0.03381619 | 307 | 8.02329592 | 1.63E-12   | *** |
| JU1200 / NIC1671  | 1.12251065 | 0.03051836 | 307 | 4.2507566  | 0.00055904 | *** |
| JU1200 / NIC1672  | 1.072802   | 0.02916645 | 307 | 2.58481887 | 0.13424479 |     |
| JU1200 / NIC1673  | 1.13256942 | 0.03079193 | 307 | 4.57887184 | 0.00013742 | *** |
| JU1200 / NIC1675  | 1.03107262 | 0.02803161 | 307 | 1.12553123 | 0.91991339 |     |
| JU1200 / NIC1676  | 1.26757228 | 0.03446375 | 307 | 8.72063522 | 1.17E-12   | *** |
| JU751 / NIC1671   | 0.90251107 | 0.02453891 | 307 | -3.7725581 | 0.00362754 | **  |
| JU751 / NIC1672   | 0.86254476 | 0.02345188 | 307 | -5.4384959 | 2.28E-06   | *** |
| JU751 / NIC1673   | 0.91059843 | 0.02475888 | 307 | -3.4444426 | 0.01150048 | *   |
| JU751 / NIC1675   | 0.82899388 | 0.02253939 | 307 | -6.8977734 | 6.35E-10   | *** |
| JU751 / NIC1676   | 1.01914223 | 0.02771128 | 307 | 0.69734372 | 0.99268438 |     |
| NIC1671 / NIC1672 | 0.95571655 | 0.02598419 | 307 | -1.6659417 | 0.63930687 |     |
| NIC1671 / NIC1673 | 1.00896095 | 0.02743231 | 307 | 0.32811614 | 0.9998988  |     |
| NIC1671 / NIC1675 | 0.91854151 | 0.02497316 | 307 | -3.1252274 | 0.03167016 | *   |
| NIC1671 / NIC1676 | 1.12922962 | 0.03070351 | 307 | 4.46990136 | 0.00022128 | *** |
| NIC1672 / NIC1673 | 1.0557115  | 0.02870295 | 307 | 1.99405778 | 0.42054372 |     |
| NIC1672 / NIC1675 | 0.96110244 | 0.0261299  | 307 | -1.4592878 | 0.76863618 |     |
| NIC1672 / NIC1676 | 1.18155286 | 0.03212567 | 307 | 6.13583829 | 5.46E-08   | *** |
| NIC1673 / NIC1675 | 0.9103836  | 0.02475144 | 307 | -3.453343  | 0.01116249 | *   |
| NIC1673 / NIC1676 | 1.11920052 | 0.03043091 | 307 | 4.14178602 | 0.0008723  | *** |
| NIC1675 / NIC1676 | 1.22937245 | 0.03342545 | 307 | 7.59511412 | 9.00E-12   | *** |

**Supplementary Note 9 (accompanies Fig. 5b). Statistical testing for differences in young adult Progenitor Zone size among the parents and ARLs. a** Raw data (PZ area in pixels) were fitted to a generalized linear model with a negative binomial distribution and log link,  $PZArea\_pixels \sim Strain$ , with a dispersion parameter of 51.4<sup>106, 107</sup>. **b, c** The R software package, 'emmeans' was used to obtain estimated marginal means on the response scale and pairwise contrasts with Tukey corrected p-values<sup>108</sup>. Area in pixels was scaled to  $\mu m^2/1,000$  for presentation in Fig. 5b (0.0504  $\mu m^2/pixel$ ). Data are provided as a Source Data file.

**a) PZ size in parental lines and ARLs: Negative binomial conditional model**

| Source        | Estimate | SE      | Z-value | Pr> z ) |     |
|---------------|----------|---------|---------|---------|-----|
| Intercept     | 11.51157 | 0.01179 | 976.3   | <2e-16  | *** |
| StrainJU751   | -0.18316 | 0.01680 | -10.9   | <2e-16  | *** |
| StrainNIC1720 | -0.18556 | 0.01680 | -11.0   | <2e-16  | *** |
| StrainNIC1725 | -0.27452 | 0.01674 | -16.4   | <2e-16  | *** |

**b) PZ size in parental lines and ARLs: Emmeans**

| Strain  | n   | response   | SE         | df  |
|---------|-----|------------|------------|-----|
| JU1200  | 140 | 99854.4059 | 1177.32195 | 545 |
| JU751   | 136 | 83142.2612 | 994.641831 | 545 |
| NIC1720 | 136 | 82943.0346 | 992.260739 | 545 |
| NIC1725 | 138 | 75883.0906 | 901.224303 | 545 |

**c) PZ size in parental lines and ARLs: Contrasts**

| Contrast          | ratio      | SE         | df  | t-ratio    | p-value    |     |
|-------------------|------------|------------|-----|------------|------------|-----|
| JU1200 / JU751    | 1.20100662 | 0.02017297 | 545 | 10.9045148 | 3.89E-10   | *** |
| JU1200 / NIC1720  | 1.2038914  | 0.02022145 | 545 | 11.0473327 | 3.89E-10   | *** |
| JU1200 / NIC1725  | 1.31589798 | 0.0220217  | 545 | 16.4037903 | 3.89E-10   | *** |
| JU751 / NIC1720   | 1.00240197 | 0.01695908 | 545 | 0.14180313 | 0.99898218 |     |
| JU751 / NIC1725   | 1.09566256 | 0.01846987 | 545 | 5.41957756 | 5.37E-07   | *** |
| NIC1720 / NIC1725 | 1.09303712 | 0.01842564 | 545 | 5.27725369 | 1.13E-06   | *** |



**Supplementary Note 10 (accompanies Fig. 5d-f). Statistical testing for differences in DTC *lag-2* expression (smFISH) among the parents and ARLs. a** Data were fitted to a generalized linear model with a negative binomial distribution and log link,  $\text{Puncta} \sim \text{Strain} * \text{Stage}$ , with a dispersion parameter of 24.7<sup>106, 107</sup>. **b, c** The R software package, 'emmeans' was used to obtain estimated marginal means on the response scale and pairwise contrasts with Tukey corrected p-values<sup>108</sup>. For data representation, see Fig 5d-f. Data are provided as a Source Data file.

**a) *lag-2* expression in parental lines and ARLs: Negative binomial conditional model**

| Source                 | Estimate | SE    | Z-value | Pr> z )  |     |
|------------------------|----------|-------|---------|----------|-----|
| Intercept              | 4.130    | 0.053 | 77.59   | <2e-16   | *** |
| StrainJU751            | -0.2347  | 0.077 | -3.06   | 0.0022   | **  |
| StrainNIC1720          | -0.0721  | 0.075 | 0.96    | 0.3354   |     |
| StrainNIC1725          | -0.4986  | 0.079 | -6.34   | 2.31E-10 | *** |
| StageeL3               | 0.6343   | 0.073 | 8.72    | <2e-16   | *** |
| StagemL4               | 0.0563   | 0.075 | 0.75    | 0.4526   |     |
| StrainJU751:StageeL3   | -0.0140  | 0.104 | -0.13   | 0.8937   |     |
| StrainNIC1720:StageeL3 | -0.6532  | 0.104 | -6.27   | 3.6E-10  | *** |
| StrainNIC1725:StageeL3 | -0.0016  | 0.107 | 0.01    | 0.9882   |     |
| StrainJU751:StagemL4   | 0.3358   | 0.107 | 3.15    | 0.0016   | **  |
| StrainNIC1720:StagemL4 | -0.0906  | 0.106 | -0.86   | 0.3921   |     |
| StrainNIC1725:StagemL4 | 0.4617   | 0.109 | 4.23    | 2.39E-05 | *** |

**b) *lag-2* expression in parental lines and ARLs: Emmeans**

| Strain  | Stage | n  | response | SE    | df  |
|---------|-------|----|----------|-------|-----|
| JU1200  | mL2   | 20 | 62.150   | 3.308 | 226 |
| JU751   | mL2   | 20 | 49.150   | 2.712 | 226 |
| NIC1720 | mL2   | 20 | 66.800   | 3.520 | 226 |
| NIC1725 | mL2   | 20 | 37.750   | 2.186 | 226 |
| JU1200  | eL3   | 20 | 117.20   | 5.807 | 226 |
| JU751   | eL3   | 20 | 91.400   | 4.638 | 226 |
| NIC1720 | eL3   | 20 | 65.550   | 3.463 | 226 |
| NIC1725 | eL3   | 20 | 71.300   | 3.725 | 226 |
| JU1200  | mL4   | 20 | 65.750   | 3.472 | 226 |
| JU751   | mL4   | 20 | 72.750   | 3.791 | 226 |
| NIC1720 | mL4   | 20 | 64.550   | 3.417 | 226 |
| NIC1725 | mL4   | 19 | 63.368   | 3.451 | 226 |

**c) *lag-2* expression in parental lines and ARLs: Contrasts**

| Contrast                  | ratio  | SE    | df  | t-ratio | p-value  |     |
|---------------------------|--------|-------|-----|---------|----------|-----|
| JU1200 mL2 / JU751 mL2    | 1.264  | 0.097 | 226 | 3.061   | 0.0985   |     |
| JU1200 mL2 / NIC1720 mL2  | 0.9303 | 0.070 | 226 | -0.9633 | 0.9983   |     |
| JU1200 mL2 / NIC1725 mL2  | 1.6464 | 0.129 | 226 | 6.339   | 8.13E-08 | *** |
| JU1200 mL2 / JU1200 eL3   | 0.5303 | 0.039 | 226 | -8.723  | 1.50E-13 | *** |
| JU1200 mL2 / JU751 eL3    | 0.6800 | 0.050 | 226 | -5.245  | 2.30E-05 | *** |
| JU1200 mL2 / NIC1720 eL3  | 0.9481 | 0.071 | 226 | -0.7102 | 0.9999   |     |
| JU1200 mL2 / NIC1725 eL3  | 0.8717 | 0.065 | 226 | -1.842  | 0.7932   |     |
| JU1200 mL2 / JU1200 mL4   | 0.9452 | 0.071 | 226 | -0.7510 | 0.9998   |     |
| JU1200 mL2 / JU751 mL4    | 0.8543 | 0.064 | 226 | -2.114  | 0.6132   |     |
| JU1200 mL2 / NIC1720 mL4  | 0.9628 | 0.072 | 226 | -0.5047 | >0.99999 |     |
| JU1200 mL2 / NIC1725 mL4  | 0.9808 | 0.075 | 226 | -0.2550 | >0.99999 |     |
| JU751 mL2 / NIC1720 mL2   | 0.7358 | 0.056 | 226 | -4.021  | 0.0044   | **  |
| JU751 mL2 / NIC1725 mL2   | 1.302  | 0.104 | 226 | 3.299   | 0.0505   |     |
| JU751 mL2 / JU1200 eL3    | 0.4194 | 0.031 | 226 | -11.717 | 1.41E-14 | *** |
| JU751 mL2 / JU751 eL3     | 0.5377 | 0.040 | 226 | -8.275  | 8.58E-13 | *** |
| JU751 mL2 / NIC1720 eL3   | 0.7498 | 0.057 | 226 | -3.769  | 0.0111   | *   |
| JU751 mL2 / NIC1725 eL3   | 0.6893 | 0.052 | 226 | -4.895  | 0.0001   | *** |
| JU751 mL2 / JU1200 mL4    | 0.7475 | 0.057 | 226 | -3.810  | 0.0096   | **  |
| JU751 mL2 / JU751 mL4     | 0.6756 | 0.051 | 226 | -5.167  | 3.33E-05 | *** |
| JU751 mL2 / NIC1720 mL4   | 0.7614 | 0.058 | 226 | -3.564  | 0.0221   | *   |
| JU751 mL2 / NIC1725 mL4   | 0.7756 | 0.060 | 226 | -3.277  | 0.0539   |     |
| NIC1720 mL2 / NIC1725 mL2 | 1.770  | 0.139 | 226 | 7.290   | 3.41E-10 | *** |
| NIC1720 mL2 / JU1200 eL3  | 0.5700 | 0.041 | 226 | -7.772  | 1.78E-11 | *** |
| NIC1720 mL2 / JU751 eL3   | 0.7308 | 0.053 | 226 | -4.286  | 0.0016   | **  |
| NIC1720 mL2 / NIC1720 eL3 | 1.019  | 0.076 | 226 | 0.2532  | >0.99999 |     |
| NIC1720 mL2 / NIC1725 eL3 | 0.9370 | 0.070 | 226 | -0.8786 | 0.9993   |     |
| NIC1720 mL2 / JU1200 mL4  | 1.016  | 0.076 | 226 | 0.2123  | >0.99999 |     |

|                           |        |       |     |         |          |     |
|---------------------------|--------|-------|-----|---------|----------|-----|
| NIC1720 mL2 / JU751 mL4   | 0.9182 | 0.068 | 226 | -1.151  | 0.9918   |     |
| NIC1720 mL2 / NIC1720 mL4 | 1.035  | 0.077 | 226 | 0.4587  | >0.99999 |     |
| NIC1720 mL2 / NIC1725 mL4 | 1.054  | 0.080 | 226 | 0.6959  | >0.99999 |     |
| NIC1725 mL2 / JU1200 eL3  | 0.3221 | 0.025 | 226 | -14.866 | <2e-16   | *** |
| NIC1725 mL2 / JU751 eL3   | 0.4130 | 0.032 | 226 | -11.485 | 2.78E-14 | *** |
| NIC1725 mL2 / NIC1720 eL3 | 0.5759 | 0.045 | 226 | -7.040  | 1.50E-09 | *** |
| NIC1725 mL2 / NIC1725 eL3 | 0.5295 | 0.041 | 226 | -8.154  | 1.72E-12 | *** |
| NIC1725 mL2 / JU1200 mL4  | 0.5741 | 0.045 | 226 | -7.081  | 1.18E-09 | *** |
| NIC1725 mL2 / JU751 mL4   | 0.5189 | 0.040 | 226 | -8.422  | 3.97E-13 | *** |
| NIC1725 mL2 / NIC1720 mL4 | 0.5848 | 0.046 | 226 | -6.837  | 4.89E-09 | *** |
| NIC1725 mL2 / NIC1725 mL4 | 0.5957 | 0.047 | 226 | -6.517  | 3.04E-08 | *** |
| JU1200 eL3 / JU751 eL3    | 1.282  | 0.091 | 226 | 3.506   | 0.0267   | *   |
| JU1200 eL3 / NIC1720 eL3  | 1.788  | 0.129 | 226 | 8.023   | 3.80E-12 | *** |
| JU1200 eL3 / NIC1725 eL3  | 1.644  | 0.118 | 226 | 6.902   | 3.36E-09 | *** |
| JU1200 eL3 / JU1200 mL4   | 1.783  | 0.129 | 226 | 7.982   | 4.87E-12 | *** |
| JU1200 eL3 / JU751 mL4    | 1.611  | 0.116 | 226 | 6.632   | 1.59E-08 | *** |
| JU1200 eL3 / NIC1720 mL4  | 1.816  | 0.132 | 226 | 8.226   | 1.12E-12 | *** |
| JU1200 eL3 / NIC1725 mL4  | 1.850  | 0.136 | 226 | 8.352   | 5.65E-13 | *** |
| JU751 eL3 / NIC1720 eL3   | 1.394  | 0.102 | 226 | 4.538   | 0.0006   | *** |
| JU751 eL3 / NIC1725 eL3   | 1.282  | 0.093 | 226 | 3.410   | 0.0361   | *   |
| JU751 eL3 / JU1200 mL4    | 1.390  | 0.102 | 226 | 4.497   | 0.0007   | *** |
| JU751 eL3 / JU751 mL4     | 1.256  | 0.091 | 226 | 3.138   | 0.0801   |     |
| JU751 eL3 / NIC1720 mL4   | 1.416  | 0.104 | 226 | 4.743   | 0.0002   | *** |
| JU751 eL3 / NIC1725 mL4   | 1.442  | 0.107 | 226 | 4.921   | 0.0001   | *** |
| NIC1720 eL3 / NIC1725 eL3 | 0.9194 | 0.068 | 226 | -1.132  | 0.9929   |     |
| NIC1720 eL3 / JU1200 mL4  | 0.9970 | 0.074 | 226 | -0.041  | >0.99999 |     |
| NIC1720 eL3 / JU751 mL4   | 0.9010 | 0.067 | 226 | -1.404  | 0.9617   |     |
| NIC1720 eL3 / NIC1720 mL4 | 1.015  | 0.076 | 226 | 0.206   | >0.99999 |     |
| NIC1720 eL3 / NIC1725 mL4 | 1.034  | 0.078 | 226 | 0.446   | >0.99999 |     |
| NIC1725 eL3 / JU1200 mL4  | 1.084  | 0.081 | 226 | 1.091   | 0.9948   |     |
| NIC1725 eL3 / JU751 mL4   | 0.9801 | 0.072 | 226 | -0.273  | >0.99999 |     |
| NIC1725 eL3 / NIC1720 mL4 | 1.105  | 0.082 | 226 | 1.337   | 0.9733   |     |
| NIC1725 eL3 / NIC1725 mL4 | 1.125  | 0.085 | 226 | 1.563   | 0.9205   |     |
| JU1200 mL4 / JU751 mL4    | 0.9038 | 0.067 | 226 | -1.364  | 0.9691   |     |
| JU1200 mL4 / NIC1720 mL4  | 1.019  | 0.076 | 226 | 0.2463  | >0.99999 |     |
| JU1200 mL4 / NIC1725 mL4  | 1.038  | 0.079 | 226 | 0.4864  | >0.99999 |     |
| JU751 mL4 / NIC1720 mL4   | 1.127  | 0.084 | 226 | 1.610   | 0.9039   |     |
| JU751 mL4 / NIC1725 mL4   | 1.148  | 0.087 | 226 | 1.832   | 0.7988   |     |
| NIC1720 mL4 / NIC1725 mL4 | 1.019  | 0.077 | 226 | 0.2433  | >0.99999 |     |

**Supplementary Note 11 accompanies Fig. 6.** Statistical testing for differences in PZ area among the parents, NILs, and ARLs (Interaction Data Set) due to the genotypes of the background (BGND) the central portion of the chromosome II QTL (C2) and the chromosome V *lag-2* variant (C5). **a** Raw data (PZ area in pixels) were fitted to a generalized linear model with a negative binomial distribution and log link,  $PZArea\_pixels \sim Background * C2 * C5 + Block + Block:Background + Block:C2$  with a dispersion parameter of 44.55<sup>106, 107</sup>. Experimental block was included as fixed effect term with significant interactions in the model. Model selection was conducted using an 'up-down' approach to optimize both the Bayesian Information Criterion (BIC) and the adjusted deviance accounted for in the model ( $D^2$ ) using the R software package, modEvA<sup>78</sup>. The package, 'emmeans' was used to obtain estimated marginal means on the response scale (**b-d**) and pairwise contrasts for the fixed effects (**f**) and interactions (**g**) with Tukey corrected p-values<sup>108</sup>. Analysis was conducted on raw data (PZ area in pixels) and y-axes were scaled to 'PZ Size' in  $\mu m^2/1,000$  for data representation in Fig. 6 ( $0.0504 \mu m^2/pixel$ ). Data are provided as a Source Data file.

Deviance Residuals:

| Min    | 1Q    | Med    | 3Q    | Max   |
|--------|-------|--------|-------|-------|
| -3.748 | -0.73 | -0.031 | 0.656 | 3.033 |

Null deviance: 4233.7 on 2785 degrees of freedom

Residual deviance: 2796.5 on 2763 degrees of freedom

AIC: 60439

BIC: 60581.48

$D^2 = 0.3339762$

$P\chi^2 = 0.3237755$

**a) PZ Area from Interaction Data Set: Negative binomial conditional model**

| Source                             | estimate | SE      | Z-value | Pr> z    |     |
|------------------------------------|----------|---------|---------|----------|-----|
| Intercept                          | 11.35674 | 0.01681 | 675.679 | < 2e-16  | *** |
| Background JU751                   | -0.12907 | 0.01872 | -6.893  | 5.44E-12 | *** |
| C2 JU751                           | -0.0436  | 0.0192  | -2.27   | 0.023188 | *   |
| C5 JU751                           | -0.12523 | 0.01437 | -8.712  | < 2e-16  | *** |
| Block A3                           | 0.18049  | 0.02117 | 8.524   | < 2e-16  | *** |
| Block B1                           | 0.07787  | 0.02053 | 3.792   | 0.000149 | *** |
| Block B2                           | 0.13552  | 0.02021 | 6.706   | 1.99E-11 | *** |
| Block N3                           | 0.19258  | 0.02371 | 8.122   | 4.57E-16 | *** |
| Block N5                           | 0.07279  | 0.02559 | 2.845   | 0.004442 | **  |
| Background JU751:C2 JU751          | -0.06228 | 0.01855 | -3.357  | 0.000788 | *** |
| Background JU751:C5 JU751          | 0.15208  | 0.01932 | 7.872   | 3.48E-15 | *** |
| C2 JU751:C5 JU751                  | 0.06673  | 0.01906 | 3.501   | 0.000463 | *** |
| Background JU751: Block A3         | -0.17217 | 0.02511 | -6.857  | 7.02E-12 | *** |
| Background JU751: Block B1         | -0.02981 | 0.02249 | -1.326  | 0.184893 |     |
| Background JU751: Block B2         | -0.04634 | 0.02165 | -2.14   | 0.03235  | *   |
| Background JU751: Block N3         | -0.02818 | 0.02474 | -1.139  | 0.254816 |     |
| Background JU751: Block N5         | -0.13209 | 0.02683 | -4.923  | 8.52E-07 | *** |
| C2 JU751: Block A3                 | -0.06427 | 0.0235  | -2.735  | 0.006239 | **  |
| C2 JU751: Block B1                 | 0.00655  | 0.02093 | 0.313   | 0.754354 |     |
| C2 JU751: Block B2                 | 0.04348  | 0.02016 | 2.157   | 0.031009 | *   |
| C2 JU751: Block N3                 | -0.05689 | 0.02418 | -2.353  | 0.018624 | *   |
| C2 JU751: Block N5                 | -0.02327 | 0.02613 | -0.891  | 0.373151 |     |
| Background JU751:C2 JU751:C5 JU751 | -0.01975 | 0.02669 | -0.74   | 0.459272 |     |

**b) PZ Area from Interaction Data Set: Emmeans (Background, C2, C5)**

| Background | C2     | C5     | n   | response   | SE         | df  |
|------------|--------|--------|-----|------------|------------|-----|
| JU1200     | JU1200 | JU1200 | 345 | 95474.4935 | 786.532429 | Inf |
| JU751      | JU1200 | JU1200 | 395 | 78390.0105 | 701.590905 | Inf |
| JU1200     | JU751  | JU1200 | 314 | 89974.616  | 819.559659 | Inf |
| JU751      | JU751  | JU1200 | 286 | 69413.5523 | 773.624993 | Inf |
| JU1200     | JU1200 | JU751  | 200 | 84236.665  | 1058.236   | Inf |
| JU751      | JU1200 | JU751  | 454 | 80523.564  | 647.430365 | Inf |
| JU1200     | JU751  | JU751  | 412 | 84862.5242 | 779.008679 | Inf |
| JU751      | JU751  | JU751  | 380 | 74732.61   | 589.913664 | Inf |

**c) PZ Area from Interaction Data Set: Emmeans (Background, C2)**

| Background | C2     | n   | response   | SE         | df  |
|------------|--------|-----|------------|------------|-----|
| JU1200     | JU1200 | 545 | 89679.7241 | 701.530732 | Inf |
| JU751      | JU1200 | 849 | 79449.6258 | 433.220653 | Inf |
| JU1200     | JU751  | 726 | 87381.1938 | 508.136821 | Inf |

JU751 | JU751 | 666 | 72023.9955 497.934192 Inf

**d) PZ Area from Interaction Data Set: Emmeans (Background, C5)**

| Background | C5     | n   | response   | SE         | df  |
|------------|--------|-----|------------|------------|-----|
| JU1200     | JU1200 | 659 | 92683.7682 | 562.992739 | Inf |
| JU751      | JU1200 | 681 | 73765.3652 | 551.563165 | Inf |
| JU1200     | JU751  | 612 | 84549.0155 | 700.082394 | Inf |
| JU751      | JU751  | 834 | 77574.0685 | 439.703409 | Inf |

**e) PZ Area from Interaction Data Set: Emmeans (C2, C5)**

| C2     | C5     | n   | response   | SE         | df  |
|--------|--------|-----|------------|------------|-----|
| JU1200 | JU1200 | 750 | 86511.54   | 527.213468 | Inf |
| JU751  | JU1200 | 600 | 79028.2083 | 554.518207 | Inf |
| JU1200 | JU751  | 654 | 82359.1919 | 612.814813 | Inf |
| JU751  | JU751  | 792 | 79636.6619 | 479.872666 | Inf |

**f) PZ Area from Interaction Data Set: Contrasts**

| Contrast (Background C2 C5 / Background C2 C5) | ratio  | SE     | df  | t-ratio | p-value  |     |
|------------------------------------------------|--------|--------|-----|---------|----------|-----|
| JU1200 JU1200 JU1200 / JU751 JU1200 JU1200     | 1.2179 | 0.0148 | Inf | 16.2405 | <2e-16   | *** |
| JU1200 JU1200 JU1200 / JU1200 JU751 JU1200     | 1.0611 | 0.0132 | Inf | 4.7798  | 4.80E-05 | *** |
| JU1200 JU1200 JU1200 / JU751 JU751 JU1200      | 1.3754 | 0.0195 | Inf | 22.5214 | <2e-16   | *** |
| JU1200 JU1200 JU1200 / JU1200 JU1200 JU751     | 1.1334 | 0.0163 | Inf | 8.7124  | 6.54E-14 | *** |
| JU1200 JU1200 JU1200 / JU751 JU1200 JU751      | 1.1857 | 0.0137 | Inf | 14.7176 | <2e-16   | *** |
| JU1200 JU1200 JU1200 / JU1200 JU751 JU751      | 1.1250 | 0.0137 | Inf | 9.6894  | 9.66E-14 | *** |
| JU1200 JU1200 JU1200 / JU751 JU751 JU751       | 1.2775 | 0.0147 | Inf | 21.3024 | <2e-16   | *** |
| JU751 JU1200 JU1200 / JU1200 JU751 JU1200      | 0.8712 | 0.0110 | Inf | -10.919 | 7.77E-14 | *** |
| JU751 JU1200 JU1200 / JU751 JU751 JU1200       | 1.1293 | 0.0154 | Inf | 8.9414  | 5.58E-14 | *** |
| JU751 JU1200 JU1200 / JU1200 JU1200 JU751      | 0.9306 | 0.0144 | Inf | -4.6344 | 9.72E-05 | *** |
| JU751 JU1200 JU1200 / JU751 JU1200 JU751       | 0.9735 | 0.0127 | Inf | -2.0561 | 0.4438   |     |
| JU751 JU1200 JU1200 / JU1200 JU751 JU751       | 0.9237 | 0.0119 | Inf | -6.1626 | 2.00E-08 | *** |
| JU751 JU1200 JU1200 / JU751 JU751 JU751        | 1.0489 | 0.0126 | Inf | 3.9874  | 0.0017   | **  |
| JU1200 JU751 JU1200 / JU751 JU751 JU1200       | 1.2962 | 0.0191 | Inf | 17.5948 | <2e-16   | *** |
| JU1200 JU751 JU1200 / JU1200 JU1200 JU751      | 1.0681 | 0.0172 | Inf | 4.0975  | 0.0012   | **  |
| JU1200 JU751 JU1200 / JU751 JU1200 JU751       | 1.1174 | 0.0137 | Inf | 9.0820  | 1.04E-13 | *** |
| JU1200 JU751 JU1200 / JU1200 JU751 JU751       | 1.0602 | 0.0150 | Inf | 4.1444  | 0.0009   | *** |
| JU1200 JU751 JU1200 / JU751 JU751 JU751        | 1.2040 | 0.0145 | Inf | 15.4204 | <2e-16   | *** |
| JU751 JU751 JU1200 / JU1200 JU1200 JU751       | 0.8240 | 0.0143 | Inf | -11.159 | 2.49E-14 | *** |
| JU751 JU751 JU1200 / JU751 JU1200 JU751        | 0.8620 | 0.0121 | Inf | -10.544 | 7.37E-14 | *** |
| JU751 JU751 JU1200 / JU1200 JU751 JU751        | 0.8180 | 0.0116 | Inf | -14.157 | <2e-16   | *** |
| JU751 JU751 JU1200 / JU751 JU751 JU751         | 0.9288 | 0.0125 | Inf | -5.4750 | 1.22E-06 | *** |
| JU1200 JU1200 JU751 / JU751 JU1200 JU751       | 1.0461 | 0.0156 | Inf | 3.0156  | 0.0523   | .   |
| JU1200 JU1200 JU751 / JU1200 JU751 JU751       | 0.9926 | 0.0144 | Inf | -0.5109 | 0.9996   |     |
| JU1200 JU1200 JU751 / JU751 JU751 JU751        | 1.1272 | 0.0169 | Inf | 7.9853  | 1.48E-13 | *** |
| JU751 JU1200 JU751 / JU1200 JU751 JU751        | 0.9489 | 0.0116 | Inf | -4.2780 | 0.0005   | *** |
| JU751 JU1200 JU751 / JU751 JU751 JU751         | 1.0775 | 0.0121 | Inf | 6.6648  | 7.42E-10 | *** |
| JU1200 JU751 JU751 / JU751 JU751 JU751         | 1.1355 | 0.0138 | Inf | 10.4520 | 7.75E-14 | *** |

**g) PZ Area from Interaction Data Set: Contrasts of Interactions**

| model term       | by                 | df1 | df2 | F-ratio | p-value |     |
|------------------|--------------------|-----|-----|---------|---------|-----|
| Background:C2    | null               | 1   | Inf | 32.599  | <0.0001 | *** |
| Background:C5    | null               | 1   | Inf | 96.984  | <0.0001 | *** |
| C2:C5            | null               | 1   | Inf | 15.452  | <0.0001 | *** |
| Background:C2    | C5=JU1200          | 1   | Inf | 11.269  | 0.0008  | *** |
| Background:C2    | C5=JU751           | 1   | Inf | 20.304  | <0.0001 | *** |
| Background:C5    | C2=JU1200          | 1   | Inf | 61.967  | <0.0001 | *** |
| Background:C5    | C2=JU751           | 1   | Inf | 43.773  | <0.0001 | *** |
| C2:C5            | Background =JU1200 | 1   | Inf | 12.258  | 0.0005  | *** |
| C2:C5            | Background =JU751  | 1   | Inf | 6.877   | 0.0087  | **  |
| Background:C2:C5 | null               | 1   | Inf | 0.548   | 0.4593  |     |

**Supplementary Note 12 accompanies Supplementary Fig. 4. Statistical testing for differences in DTC lag-2 expression in JU1200 and JU751 at mid L3 and young adult. a** Data were fitted to a generalized linear model with a negative binomial distribution and log link,  $Puncta \sim Strain * Stage$  with a dispersion parameter of 66.4<sup>106, 107</sup>. **b, c** The R software package, 'emmeans' was used to obtain estimated marginal means on the response scale and pairwise contrasts with Tukey corrected p-values<sup>108</sup>. For data representation, see Supplementary Fig. 4. Data are provided as a Source Data file.

**a) Number of lag-2 puncta in parental lines: Negative binomial conditional model**

| Source              | Estimate | SE      | Z-value | Pr> z ) |     |
|---------------------|----------|---------|---------|---------|-----|
| Intercept           | 4.77153  | 0.03429 | 139.15  | <2e-16  | *** |
| StrainJU751         | -0.13389 | 0.04912 | -2.73   | 0.00641 | **  |
| StageYA             | -0.77793 | 0.05339 | -14.57  | <2e-16  | *** |
| StrainJU751:StageYA | -0.16475 | 0.07672 | 2.18    | 0.02956 | *   |

**b) Number of lag-2 puncta in parental lines: Emmeans**

| Strain | Stage | n  | response | SE    | df |
|--------|-------|----|----------|-------|----|
| JU1200 | mL3   | 20 | 118.10   | 4.050 | 75 |
| JU751  | mL3   | 20 | 103.30   | 3.633 | 75 |
| JU1200 | YA    | 20 | 54.25    | 2.220 | 75 |
| JU751  | YA    | 20 | 55.95    | 2.270 | 75 |

**c) Number of lag-2 puncta in parental lines: Contrasts**

| Contrast               | ratio | SE    | df | t-ratio | p-value |     |
|------------------------|-------|-------|----|---------|---------|-----|
| JU1200 mL3 / JU751 mL3 | 1.143 | 0.056 | 75 | 2.726   | 0.0390  | *   |
| JU1200 mL3 / JU1200 YA | 2.177 | 0.116 | 75 | 14.572  | <2e-16  | *** |
| JU1200 mL3 / JU751 YA  | 2.111 | 0.112 | 75 | 14.063  | <2e-16  | *** |
| JU751 mL3 / JU1200 YA  | 1.904 | 0.103 | 75 | 11.937  | <2e-16  | *** |
| JU751 mL3 / JU751 YA   | 1.846 | 0.099 | 75 | 11.420  | <2e-16  | *** |
| JU1200 YA / JU751 YA   | 0.970 | 0.056 | 75 | -0.535  | 0.9501  |     |
