# Supplementary material for: Higher-order epistasis shapes natural variation in germ stem cell niche activity
Source: PubMed Central journal article supplement (PMC10192456; doi:10.1038/s41467-023-38527-0), 2023-05-17
Supplement: 41467_2023_38527_MOESM3_ESM.pdf [file 41467_2023_38527_MOESM3_ESM.pdf]

## **Description of Additional Supplementary Files**

File Name: Supplementary Data 1

Description: A table listing all of the oligonucleotides used in this study

File Name: Supplementary Data 2

Description: A table listing all of the strains used in this study
