# Supplementary material for: Higher-order epistasis shapes natural variation in germ stem cell niche activity
Source: PubMed Central journal article supplement (PMC10192456; doi:10.1038/s41467-023-38527-0), 2023-05-17
Supplement: 41467_2023_38527_MOESM6_ESM.pdf [file 41467_2023_38527_MOESM6_ESM.pdf]

## Reporting Summary

Nature Portfolio wishes to improve the reproducibility of the work that we publish. This form provides structure for consistency and transparency in reporting. For further information on Nature Portfolio policies, see our [Editorial Policies](#) and the [Editorial Policy Checklist](#).

### Statistics

For all statistical analyses, confirm that the following items are present in the figure legend, table legend, main text, or Methods section.

n/a Confirmed

- The exact sample size ( $n$ ) for each experimental group/condition, given as a discrete number and unit of measurement
- A statement on whether measurements were taken from distinct samples or whether the same sample was measured repeatedly
- The statistical test(s) used AND whether they are one- or two-sided  
*Only common tests should be described solely by name; describe more complex techniques in the Methods section.*
- A description of all covariates tested
- A description of any assumptions or corrections, such as tests of normality and adjustment for multiple comparisons
- A full description of the statistical parameters including central tendency (e.g. means) or other basic estimates (e.g. regression coefficient) AND variation (e.g. standard deviation) or associated estimates of uncertainty (e.g. confidence intervals)
- For null hypothesis testing, the test statistic (e.g.  $F$ ,  $t$ ,  $r$ ) with confidence intervals, effect sizes, degrees of freedom and  $P$  value noted  
*Give  $P$  values as exact values whenever suitable.*
- For Bayesian analysis, information on the choice of priors and Markov chain Monte Carlo settings
- For hierarchical and complex designs, identification of the appropriate level for tests and full reporting of outcomes
- Estimates of effect sizes (e.g. Cohen's  $d$ , Pearson's  $r$ ), indicating how they were calculated

*Our web collection on [statistics for biologists](#) contains articles on many of the points above.*

### Software and code

Policy information about [availability of computer code](#)

Data collection

Data analysis

For manuscripts utilizing custom algorithms or software that are central to the research but not yet described in published literature, software must be made available to editors and reviewers. We strongly encourage code deposition in a community repository (e.g. GitHub). See the Nature Portfolio [guidelines for submitting code & software](#) for further information.

## Data

Policy information about [availability of data](#)

All manuscripts must include a [data availability statement](#). This statement should provide the following information, where applicable:

- Accession codes, unique identifiers, or web links for publicly available datasets
- A description of any restrictions on data availability
- For clinical datasets or third party data, please ensure that the statement adheres to our [policy](#)

Raw data are available in Data S1. The following publicly available databases were referenced and used in this study: Wormbase (<https://wormbase.org/#012-34-5>) and the C. elegans Natural Diversity Resource (<https://elegansvariation.org/>).

## Human research participants

Policy information about [studies involving human research participants and Sex and Gender in Research](#).

|                             |                                  |
|-----------------------------|----------------------------------|
| Reporting on sex and gender | <input type="text" value="N/A"/> |
| Population characteristics  | <input type="text" value="N/A"/> |
| Recruitment                 | <input type="text" value="N/A"/> |
| Ethics oversight            | <input type="text" value="N/A"/> |

Note that full information on the approval of the study protocol must also be provided in the manuscript.

## Field-specific reporting

Please select the one below that is the best fit for your research. If you are not sure, read the appropriate sections before making your selection.

Life sciences  Behavioural & social sciences  Ecological, evolutionary & environmental sciences

For a reference copy of the document with all sections, see [nature.com/documents/nr-reporting-summary-flat.pdf](https://nature.com/documents/nr-reporting-summary-flat.pdf)

## Life sciences study design

All studies must disclose on these points even when the disclosure is negative.

|                 |                                                                                                                                                                                                                                                                                                                                                                                                                                                                                                                                  |
|-----------------|----------------------------------------------------------------------------------------------------------------------------------------------------------------------------------------------------------------------------------------------------------------------------------------------------------------------------------------------------------------------------------------------------------------------------------------------------------------------------------------------------------------------------------|
| Sample size     | 20-40 samples were measured for each independent group. This value was chosen based on a sample size calculator ( <a href="http://powerandsamplesize.com/Calculators/Compare-k-Means/1-Way-ANOVA-Pairwise">http://powerandsamplesize.com/Calculators/Compare-k-Means/1-Way-ANOVA-Pairwise</a> ). Parameters: 100-400 pairwise comparisons per experimental block; two groups (the parental strains) with means of 47633 and 37584 pixels and 6640 standard deviation in a pilot study; Type I and Type II error rates set to 5%. |
| Data exclusions | When modeling, influential points were excluded based on a cook's distance cutoff of 6/n.                                                                                                                                                                                                                                                                                                                                                                                                                                        |
| Replication     | Experiments were repeated 1-9 times. Attempts at replication were successful. It should be noted that PZ size is sensitive to environmental conditions including temperature, worm density, and the presence of contamination on the plates. To successfully reproduce the results, steps should be taken to ensure that lines are raised on "clean" uncrowded plates as described in the Materials and Methods and plates are stored in a 20C incubator.                                                                        |
| Randomization   | <input type="text" value="N/A"/>                                                                                                                                                                                                                                                                                                                                                                                                                                                                                                 |
| Blinding        | Images were given random filenames by manually reassigning names based on a random number sequence before PZ size measurement. A key was created in this process. After measurements, the key was used to match the filenames back up to the identifying information including line or strain name.                                                                                                                                                                                                                              |

## Reporting for specific materials, systems and methods

We require information from authors about some types of materials, experimental systems and methods used in many studies. Here, indicate whether each material, system or method listed is relevant to your study. If you are not sure if a list item applies to your research, read the appropriate section before selecting a response.

## Materials &amp; experimental systems

## Methods

| n/a                                 | Included in the study                                           |
|-------------------------------------|-----------------------------------------------------------------|
| <input checked="" type="checkbox"/> | <input type="checkbox"/> Antibodies                             |
| <input checked="" type="checkbox"/> | <input type="checkbox"/> Eukaryotic cell lines                  |
| <input checked="" type="checkbox"/> | <input type="checkbox"/> Palaeontology and archaeology          |
| <input type="checkbox"/>            | <input checked="" type="checkbox"/> Animals and other organisms |
| <input checked="" type="checkbox"/> | <input type="checkbox"/> Clinical data                          |
| <input checked="" type="checkbox"/> | <input type="checkbox"/> Dual use research of concern           |

| n/a                                 | Included in the study                           |
|-------------------------------------|-------------------------------------------------|
| <input checked="" type="checkbox"/> | <input type="checkbox"/> ChIP-seq               |
| <input checked="" type="checkbox"/> | <input type="checkbox"/> Flow cytometry         |
| <input checked="" type="checkbox"/> | <input type="checkbox"/> MRI-based neuroimaging |

## Animals and other research organisms

Policy information about [studies involving animals](#); [ARRIVE guidelines](#) recommended for reporting animal research, and [Sex and Gender in Research](#)

## Laboratory animals

AF16, C. briggsae  
 CB4856 C. elegans  
 CX11262 C. elegans  
 HK104 C. briggsae  
 JU576 C. elegans  
 JU577 C. elegans  
 JU584 C. elegans  
 JU636 C. elegans  
 JU637 C. elegans  
 JU644 C. elegans  
 JU656 C. elegans  
 JU660 C. elegans  
 JU751 C. elegans  
 JU752 C. elegans  
 JU753 C. elegans  
 JU754 C. elegans  
 JU755 C. elegans  
 JU756 C. elegans  
 JU775 C. elegans  
 JU815 C. elegans  
 JU816 C. elegans  
 JU817 C. elegans  
 JU818 C. elegans  
 JU821 C. elegans  
 JU1200 C. elegans  
 JU1491 C. elegans  
 N2 C. elegans  
 NIC601 C. elegans  
 NIC606 C. elegans  
 NIC610 C. elegans  
 NIC617 C. elegans  
 NIC619 C. elegans  
 NIC621 C. elegans  
 NIC623 C. elegans  
 NIC624 C. elegans  
 NIC625 C. elegans  
 NIC626 C. elegans  
 NIC628 C. elegans  
 NIC630 C. elegans  
 NIC631 C. elegans  
 NIC633 C. elegans  
 NIC636 C. elegans  
 NIC640 C. elegans  
 NIC643 C. elegans  
 NIC646 C. elegans  
 NIC647 C. elegans  
 NIC649 C. elegans  
 NIC650 C. elegans  
 NIC653 C. elegans  
 NIC654 C. elegans  
 NIC655, C. elegans  
 NIC660 C. elegans  
 NIC661 C. elegans  
 NIC662 C. elegans  
 NIC664 C. elegans  
 NIC665 C. elegans

NIC666 C. elegans  
 NIC667 C. elegans  
 NIC668 C. elegans  
 NIC671 C. elegans  
 NIC675 C. elegans  
 NIC678 C. elegans  
 NIC680 C. elegans  
 NIC681 C. elegans  
 NIC685 C. elegans  
 NIC686 C. elegans  
 NIC687 C. elegans  
 NIC691 C. elegans  
 NIC692 C. elegans  
 NIC694 C. elegans  
 NIC696, C. elegans  
 NIC697 C. elegans  
 NIC698 C. elegans  
 NIC699 C. elegans  
 NIC700 C. elegans  
 NIC702 C. elegans  
 NIC703 C. elegans  
 NIC704 C. elegans  
 NIC705 C. elegans  
 NIC707 C. elegans  
 NIC709 C. elegans  
 NIC710 C. elegans  
 NIC711 C. elegans  
 NIC713 C. elegans  
 NIC716 C. elegans  
 NIC717 C. elegans  
 NIC721 C. elegans  
 NIC727 C. elegans  
 NIC728 C. elegans  
 NIC729 C. elegans  
 NIC730 C. elegans  
 NIC731 C. elegans  
 NIC734 C. elegans  
 NIC735 C. elegans  
 NIC736 C. elegans  
 NIC739 C. elegans  
 NIC740 C. elegans  
 NIC741 C. elegans  
 NIC742 C. elegans  
 NIC1671 C. elegans  
 NIC1672 C. elegans  
 NIC1673 C. elegans  
 NIC1675 C. elegans  
 NIC1676 C. elegans  
 NIC1697 C. elegans  
 NIC1701 C. elegans  
 NIC1702 C. elegans  
 NIC1713 C. elegans  
 NIC1714 C. elegans  
 NIC1715 C. elegans  
 NIC1716 C. elegans  
 NIC1717 C. elegans  
 NIC1719 C. elegans  
 NIC1720 C. elegans  
 NIC1723 C. elegans  
 NIC1724 C. elegans  
 NIC1725 C. elegans  
 NIC2091 C. elegans  
 MY16 C. elegans

Wild animals

N/A

Reporting on sex

Findings apply to hermaphrodites.

Field-collected samples

N/A

Ethics oversight

No ethical approval or guidelines were required because only nematodes were used in this study.

Note that full information on the approval of the study protocol must also be provided in the manuscript.
